# Supplementary material for: Situation analysis for delivering integrated comprehensive sexual and reproductive health services in humanitarian crisis condition for Rohingya refugees in Cox’s Bazar, Bangladesh: protocol for a mixed-method study
Source: PubMed Central journal article supplement (PMC6615844; doi:10.1136/bmjopen-2018-028340), 2019-07-03
Supplement: bmjopen-2018-028340supp001.pdf [file bmjopen-2018-028340supp001.pdf]

## Situation Analysis for Delivering Integrated Comprehensive SRHR Services for Rohingya Refugees in Cox's Bazar, Bangladesh

### Facility Assessment

Conducted by  
BRAC James P Grant School of Public Health (JPGSPH), BRAC University  
Funded by  
World Health Organization (WHO)

### Questionnaire and Checklists (For Health Facilities)

|                                                       |  |
|-------------------------------------------------------|--|
| A1. Unique identification number of the facility      |  |
| A2. Serial number of the facility                     |  |
| A3. Name of the Upazila                               |  |
| A4. Name of the camp/area                             |  |
| A5. Name of the health facility                       |  |
| A6. Date of the assessment                            |  |
| A7. Starting time of the assessment                   |  |
| A8. Ending time of the assessment                     |  |
| A9. Name of the Respondent, Designation & Cell number |  |
| A10. Name of the assessor                             |  |
| A11. Signature of the assessor                        |  |

## 1. General Information

### 1.1 Types of the facility (Please circle the appropriate one)

- a. Community clinic
- b. Health post
- c. Primary Health Center (PHC)
- d. National non-government organization (NNGO) Hospital
- e. International non-government organization (INGO) Hospital
- f. Other (Specify)

### 1.2 Management of the facility (Please circle the appropriate one)

- a. Government organization (GO) (Specify) \_\_\_\_\_
- b. National non-government organization (NNGO) (Specify) \_\_\_\_\_
- c. International non-government organization (INGO) (Specify) \_\_\_\_\_
- d. Ownership by more than one organization (Specify) (Specify) \_\_\_\_\_
- e. Other (Specify) \_\_\_\_\_

### 1.3 Source of external Financial/resource support if applicable (Please circle the appropriate one)

- a. Government organization (GO) (Specify) \_\_\_\_\_
- b. National non-government organization (NNGO) (Specify) \_\_\_\_\_
- c. International non-government organization (INGO) (Specify) \_\_\_\_\_
- d. Multi-donor (Specify) \_\_\_\_\_
- e. Other (Specify) \_\_\_\_\_

### 1.4 How many days per week is the facility opened? (Please circle the appropriate one)

- a. 7 days a week
- b. 6 days a week
- c. 5 days a week
- d. Others (Specify)

### 1.5 What is your Working hours? (Please circle the appropriate one)

- a. 24 hours
- b. 9 am - 4 pm
- Other (specify)

### 1.6 Estimated number of population served by your facility: \_\_\_\_\_

## 2. Health service information

### 2.1 Availability of sexual and reproductive health services

| Serial no. | Name of the services                                                                                                                                                                                                                                                                                    | Code<br><br>1 = Yes<br>0 = Not available | Designation of the service provider/s<br><br>Code: 1, 2, 3, 4, 5, 6, 7, 8, 9, 97<br><i>(for the details of this code follow the attached codebook)</i> | If the service is not available, then do you refer the patients?<br><br>Code<br>1 = Yes<br>0 = No | If yes, write the referred place/s<br><br><i>(Most frequently referred)</i> |
|------------|---------------------------------------------------------------------------------------------------------------------------------------------------------------------------------------------------------------------------------------------------------------------------------------------------------|------------------------------------------|--------------------------------------------------------------------------------------------------------------------------------------------------------|---------------------------------------------------------------------------------------------------|-----------------------------------------------------------------------------|
| 1.         | ANC                                                                                                                                                                                                                                                                                                     |                                          |                                                                                                                                                        |                                                                                                   |                                                                             |
| 1.1        | <b>Obstetric and foetal assessment –</b> <ul style="list-style-type: none"> <li>• Maternal weight</li> <li>• BP measurement</li> <li>• Oedema</li> <li>• Fundal height</li> <li>• Foetal heartbeat</li> </ul>                                                                                           |                                          |                                                                                                                                                        |                                                                                                   |                                                                             |
| 1.2        | <b>Screening and tests</b> <ul style="list-style-type: none"> <li>• Urinalysis</li> <li>• Hb estimation</li> <li>• Blood grouping and Rh typing</li> <li>• Testing for HIV, syphilis</li> <li>• Blood sugar</li> <li>• Ultrasonogram<br/>(referred cases for suspicion of low foetal growth)</li> </ul> |                                          |                                                                                                                                                        |                                                                                                   |                                                                             |
| 1.3        | <b>Identify &amp; manage obstetric emergencies</b> <ul style="list-style-type: none"> <li>• Pre/eclampsia</li> <li>• Ante-partum Haemorrhage</li> <li>• Abdominal pain</li> <li>• Premature rupture of membranes</li> </ul>                                                                             |                                          |                                                                                                                                                        |                                                                                                   |                                                                             |
| 1.4        | <b>Health education, advice, and counselling</b><br>(Nutrition,                                                                                                                                                                                                                                         |                                          |                                                                                                                                                        |                                                                                                   |                                                                             |

| Serial no. | Name of the services                                                                                                                                                           | Code<br><br>1 = Yes<br>0 = Not available | Designation of the service provider/s<br><br>Code: 1, 2, 3, 4, 5, 6, 7, 8, 9, 97<br><i>(for the details of this code follow the attached codebook)</i> | If the service is not available, then do you refer the patients?<br><br>Code<br>1 = Yes<br>0 = No | If yes, write the referred place/s<br><br><i>(Most frequently referred)</i> |
|------------|--------------------------------------------------------------------------------------------------------------------------------------------------------------------------------|------------------------------------------|--------------------------------------------------------------------------------------------------------------------------------------------------------|---------------------------------------------------------------------------------------------------|-----------------------------------------------------------------------------|
|            | Complications of pregnancy / danger sign, Rest, Birth plan and emergency plan)                                                                                                 |                                          |                                                                                                                                                        |                                                                                                   |                                                                             |
| 2.         | Eclampsia Management                                                                                                                                                           |                                          |                                                                                                                                                        |                                                                                                   |                                                                             |
| 3.         | PPH (Postpartum Hemorrhage) Management                                                                                                                                         |                                          |                                                                                                                                                        |                                                                                                   |                                                                             |
| 4.         | Maternal Immunization                                                                                                                                                          |                                          |                                                                                                                                                        |                                                                                                   |                                                                             |
| 5.         | Delivery Care <ul style="list-style-type: none"> <li>• Normal Vaginal Delivery</li> <li>• C-section</li> <li>• Deliveries that require vacuum extraction assistance</li> </ul> |                                          |                                                                                                                                                        |                                                                                                   |                                                                             |
| 6.         | Initial stabilization of obstetric emergency before referral                                                                                                                   |                                          |                                                                                                                                                        |                                                                                                   |                                                                             |
| 7.         | Blood transfusion                                                                                                                                                              |                                          |                                                                                                                                                        |                                                                                                   |                                                                             |
| 8.         | Essential new born care                                                                                                                                                        |                                          |                                                                                                                                                        |                                                                                                   |                                                                             |
| 9.         | Post Natal Care                                                                                                                                                                |                                          |                                                                                                                                                        |                                                                                                   |                                                                             |
| 9.1        | Counselling on postnatal care, breastfeeding, etc.                                                                                                                             |                                          |                                                                                                                                                        |                                                                                                   |                                                                             |

| Serial no. | Name of the services                                                                                     | Code<br><br>1 = Yes<br>0 = Not available | Designation of the service provider/s<br><br>Code: 1, 2, 3, 4, 5, 6, 7, 8, 9, 97<br><i>(for the details of this code follow the attached codebook)</i> | If the service is not available, then do you refer the patients?<br><br>Code<br>1 = Yes<br>0 = No | If yes, write the referred place/s<br><br><i>(Most frequently referred)</i> |
|------------|----------------------------------------------------------------------------------------------------------|------------------------------------------|--------------------------------------------------------------------------------------------------------------------------------------------------------|---------------------------------------------------------------------------------------------------|-----------------------------------------------------------------------------|
| 9.2        | Post-Natal clinical history (pain, fever, haemorrhage)                                                   |                                          |                                                                                                                                                        |                                                                                                   |                                                                             |
| 9.3        | Identification and management of post-natal complications:<br>-Anaemia<br>-Puerperal psychosis           |                                          |                                                                                                                                                        |                                                                                                   |                                                                             |
| 9.4        | Identification and management of obstetric complications:<br>-Haemorrhage<br>-Puerperal infection/sepsis |                                          |                                                                                                                                                        |                                                                                                   |                                                                             |
| 9.5        | Supply of Iron and Folic Acid                                                                            |                                          |                                                                                                                                                        |                                                                                                   |                                                                             |
| 9.6        | Counselling and Provision of FP methods                                                                  |                                          |                                                                                                                                                        |                                                                                                   |                                                                             |
| 10.        | Family Planning                                                                                          |                                          |                                                                                                                                                        |                                                                                                   |                                                                             |
| 11.        | FP services: Pill                                                                                        |                                          |                                                                                                                                                        |                                                                                                   |                                                                             |
| 12.        | FP services: Male Condoms                                                                                |                                          |                                                                                                                                                        |                                                                                                   |                                                                             |
| 13.        | Emergency Contraception                                                                                  |                                          |                                                                                                                                                        |                                                                                                   |                                                                             |
| 14.        | FP services: Injection                                                                                   |                                          |                                                                                                                                                        |                                                                                                   |                                                                             |
| 15.        | FP services: Implant/Norplant                                                                            |                                          |                                                                                                                                                        |                                                                                                   |                                                                             |
| 16.        | FP services: IUD                                                                                         |                                          |                                                                                                                                                        |                                                                                                   |                                                                             |

| Serial no. | Name of the services                                                                                                               | Code<br><br>1 = Yes<br>0 = Not available | Designation of the service provider/s<br><br>Code: 1, 2, 3, 4, 5, 6, 7, 8, 9, 97<br><i>(for the details of this code follow the attached codebook)</i> | If the service is not available, then do you refer the patients?<br><br>Code<br>1 = Yes<br>0 = No | If yes, write the referred place/s<br><br><i>(Most frequently referred)</i> |
|------------|------------------------------------------------------------------------------------------------------------------------------------|------------------------------------------|--------------------------------------------------------------------------------------------------------------------------------------------------------|---------------------------------------------------------------------------------------------------|-----------------------------------------------------------------------------|
| 17.        | FP services:<br>Vasectomy                                                                                                          |                                          |                                                                                                                                                        |                                                                                                   |                                                                             |
| 18.        | FP services:<br>Tubectomy                                                                                                          |                                          |                                                                                                                                                        |                                                                                                   |                                                                             |
| 19.        | STD/RTI Management                                                                                                                 |                                          |                                                                                                                                                        |                                                                                                   |                                                                             |
| 20.        | HIV AIDS Counseling                                                                                                                |                                          |                                                                                                                                                        |                                                                                                   |                                                                             |
| 21.        | HIV AIDS Testing                                                                                                                   |                                          |                                                                                                                                                        |                                                                                                   |                                                                             |
| 22.        | Prevention of maternal –to-child transmission of HIV (PMTCT) <i>(one kind of medicine to stop transmitting HIV to the newborn)</i> |                                          |                                                                                                                                                        |                                                                                                   |                                                                             |
| 23.        | Menstrual regulation (MR)                                                                                                          |                                          |                                                                                                                                                        |                                                                                                   |                                                                             |
| 24.        | Management of miscarriage and complications of abortions                                                                           |                                          |                                                                                                                                                        |                                                                                                   |                                                                             |
| 25.        | Clinical Management of Rape (CMR)                                                                                                  |                                          |                                                                                                                                                        |                                                                                                   |                                                                             |
| 26.        | Management of Psychosocial issues                                                                                                  |                                          |                                                                                                                                                        |                                                                                                   |                                                                             |
| 27.        | Adolescent friendly health services (counseling on Sex education/ sexual health care)                                              |                                          |                                                                                                                                                        |                                                                                                   |                                                                             |
| 28.        | Adolescent friendly health services                                                                                                |                                          |                                                                                                                                                        |                                                                                                   |                                                                             |

| Serial no. | Name of the services                                                | Code<br>1 = Yes<br>0 = Not available | Designation of the service provider/s<br>Code: 1, 2, 3, 4, 5, 6, 7, 8, 9, 97<br><i>(for the details of this code follow the attached codebook)</i> | If the service is not available, then do you refer the patients?<br>Code<br>1 = Yes<br>0 = No | If yes, write the referred place/s<br><i>(Most frequently referred)</i> |
|------------|---------------------------------------------------------------------|--------------------------------------|----------------------------------------------------------------------------------------------------------------------------------------------------|-----------------------------------------------------------------------------------------------|-------------------------------------------------------------------------|
|            | (counseling on FP services)                                         |                                      |                                                                                                                                                    |                                                                                               |                                                                         |
| 29.        | Adolescent friendly health services<br>(counseling on HIV services) |                                      |                                                                                                                                                    |                                                                                               |                                                                         |
| 30.        | Others                                                              |                                      |                                                                                                                                                    |                                                                                               |                                                                         |

2.2 If you don't provide the SRHR services, please mention the reason for not providing the SRHR services.

---



---



---

### 2.3 Human Resources: Key Staff information

| Serial no. | Categories                        | No of staff | Job Nature Code<br>1= Fulltime<br>2= Part-time<br>3= On-call |
|------------|-----------------------------------|-------------|--------------------------------------------------------------|
| 1.         | Gynecologists / Gynae Consultant  |             |                                                              |
| 2.         | Anesthesiologist                  |             |                                                              |
| 3.         | Residential Medical Officer (RMO) |             |                                                              |

| Serial no. | Categories                                   | No of staff | Job Nature Code<br>1= Fulltime<br>2= Part-time<br>3= On-call |
|------------|----------------------------------------------|-------------|--------------------------------------------------------------|
| 4.         | Medical Officer                              |             |                                                              |
| 5.         | Medical Assistant                            |             |                                                              |
| 6.         | SACMO                                        |             |                                                              |
| 7.         | Health Inspector                             |             |                                                              |
| 8.         | Nurse                                        |             |                                                              |
| 9.         | Midwife                                      |             |                                                              |
| 10.        | Trained Birth Attendants (TBAs)              |             |                                                              |
| 11.        | Family Welfare Assistant (FWA)               |             |                                                              |
| 12.        | Community Health Care Provider (CHCP)        |             |                                                              |
| 13.        | Psycho-social Counsellor                     |             |                                                              |
| 14.        | Laboratory technicians/ Medical Technologist |             |                                                              |
| 97.        | Others (Specify)                             |             |                                                              |

## 2.4 Training

If any of your staff received any of the following training:

| Serial No. | Types of Training (RECEIVED IN THE PAST Three MONTHS) | Code<br>1 = Yes<br>0 = No | Who received it (Doctor, Nurse, Midwives etc?) Code: 1 – 20, 97<br><i>(for the details of this code follow the attached codebook)</i> |
|------------|-------------------------------------------------------|---------------------------|---------------------------------------------------------------------------------------------------------------------------------------|
| 1.         | Helping Babies Breathe                                |                           |                                                                                                                                       |
| 2.         | Emergency Response                                    |                           |                                                                                                                                       |
| 3.         | Helping Mothers Survive                               |                           |                                                                                                                                       |



|     |                                                                 |  |  |
|-----|-----------------------------------------------------------------|--|--|
| 4.  | Gender Based Violence                                           |  |  |
| 5.  | Clinical Management of Rape (CMR)                               |  |  |
| 6.  | OGSB Training - FP (Long Acting & Permanent)                    |  |  |
| 7.  | EmONC                                                           |  |  |
| 8.  | OGSB Training - Infection Prevention Control                    |  |  |
| 9.  | OGSB Training – RTI & STI                                       |  |  |
| 10. | OGSB Training – Management & Care of Maternal & Child Nutrition |  |  |
| 11. | ANC Package                                                     |  |  |
| 12. | MR & PAC                                                        |  |  |
| 13. | Orientation on community distribution of misoprostol            |  |  |
| 14. | MISP Training for Coordinator                                   |  |  |
| 15. | OGSB Training – Safe Delivery Practice                          |  |  |
| 16. | Labor Room Protocol                                             |  |  |
| 17. | Cervical Cancer Screening                                       |  |  |
| 18. | FP Counselling                                                  |  |  |
| 19. | IUD                                                             |  |  |
| 20. | Implant                                                         |  |  |
| 21. | PPIUD                                                           |  |  |
| 22. | Others                                                          |  |  |

2.4.1 Do you think is there any other training that you/your staff need to receive?

a. No = 0

b. Yes = 1 If Yes, specify \_\_\_\_\_

## 2.5 Information on total number of services

2.5.1 On average total number of Outpatient served in a day?

2.5.2 Total number of inpatient served in a month? (Last month/3 month average)

2.5.3 Information on total number of services

| Serial no. | Services and Quantity                  | July 2018 | August 2018 | September 2018 |
|------------|----------------------------------------|-----------|-------------|----------------|
| 1.         | No. of total patients served           |           |             |                |
| 2.         | No. of ANC                             |           |             |                |
| 3.         | Eclampsia Management                   |           |             |                |
| 4.         | PPH (Postpartum Hemorrhage) Management |           |             |                |
| 5.         | Total delivery                         |           |             |                |
|            | Normal Delivery                        |           |             |                |
|            | C section                              |           |             |                |
| 6.         | No. of PNC                             |           |             |                |
| 7.         | Blood Transfusion                      |           |             |                |
| 8.         | No. of FP counseling                   |           |             |                |
| 9.         | FP services: Pill                      |           |             |                |
| 10.        | FP services: Condom                    |           |             |                |
| 11.        | FP services: Injection                 |           |             |                |
| 12.        | FP services: Implant/Norplant          |           |             |                |
| 13.        | FP services: IUD                       |           |             |                |
| 14.        | FP services: Vasectomy                 |           |             |                |
| 15.        | FP services: Tubectomy                 |           |             |                |
| 16.        | No. of STD/RTI screening               |           |             |                |
| 17.        | No. of STD/RTI treatment               |           |             |                |
| 18.        | No of HIV/AIDS counselling             |           |             |                |
| 19.        | No of HIV/AIDS screening               |           |             |                |

| Serial no. | Services and Quantity                                           | July 2018 | August 2018 | September 2018 |
|------------|-----------------------------------------------------------------|-----------|-------------|----------------|
| 20.        | No. of MR service                                               |           |             |                |
| 21.        | No. of management of miscarriage and complications of abortions |           |             |                |
| 22.        | No of Post rape treatment                                       |           |             |                |
| 23.        | No. of adolescent health service                                |           |             |                |
| 24.        | Total no. of referred patients                                  |           |             |                |
| 25.        | Other (Specify                                                  |           |             |                |

## 2.6 Availability of ambulance service

2.6.1 Is there any ambulance services in your facility?

a. Yes = 1

b. No = 0

2.6.2 If yes, then how many do you have?

2.6.3 If No, Then do you have access to other's (private/NGO/UN/govt.) ambulance services that you could use?

a. Yes = 1, Specify whose \_\_\_\_\_

b. No = 0

2.6.4 When do you refer patients, how do you transport them to the referred place? (Mode of transportation)

\_\_\_\_\_ (Free Listing)

## 2.7 Structure of the facility /Availability of rooms (related to SRH)

| Serial no. | Name of department/room      | Code<br>1 = Yes<br>0 = Not available | Remark |
|------------|------------------------------|--------------------------------------|--------|
| 1.         | Emergency room               |                                      |        |
| 2.         | Consultant's room            |                                      |        |
| 3.         | Counselling room             |                                      |        |
| 4.         | Patient's waiting place      |                                      |        |
| 5.         | ANC/PNC room                 |                                      |        |
| 6.         | Labor Room                   |                                      |        |
| 7.         | Labor Ward                   |                                      |        |
| 8.         | Women Ward                   |                                      |        |
| 9.         | VIA/PAC room                 |                                      |        |
| 10.        | Room for USG                 |                                      |        |
| 11.        | Laboratory for lab tests     |                                      |        |
| 12.        | Room for blood transfusion   |                                      |        |
| 13.        | Maternity OPD                |                                      |        |
| 14.        | Breast feeding corner in OPD |                                      |        |
| 15.        | General Operation Theatre    |                                      |        |
| 16.        | Dispensary                   |                                      |        |
| 17.        | Other (Specify)              |                                      |        |

2.8 Number of maternity beds at the facility

2.9 Number of beds occupied by the patients on average

### 3. Equipment, drugs and supplies

| Serial No | KIT Number & Name                                                    | Received?<br>Yes = 1<br>No = 0 | If yes,<br>How<br>many?<br>(Boxes) | If No, Then Why? | If not a UNFPA<br>KIT receiver<br>then how do<br>you procure/<br>source those<br>drugs and<br>supplies |
|-----------|----------------------------------------------------------------------|--------------------------------|------------------------------------|------------------|--------------------------------------------------------------------------------------------------------|
| 1         | Kit 1: Condoms                                                       |                                |                                    |                  |                                                                                                        |
| 2         | Kit 2: Clean Delivery, Individual                                    |                                |                                    |                  |                                                                                                        |
| 3         | Kit 3: Post Rape Treatment                                           |                                |                                    |                  |                                                                                                        |
| 4         | Kit 4 Oral And Injectable<br>Contraception                           |                                |                                    |                  |                                                                                                        |
| 5         | Kit 5: Treatment Of Sexually<br>Transmitted Infections               |                                |                                    |                  |                                                                                                        |
| 6         | Kit 6: Clinical Delivery Assistance                                  |                                |                                    |                  |                                                                                                        |
| 7         | Kit 7: Intrauterine Device                                           |                                |                                    |                  |                                                                                                        |
| 8         | Kit 8: Management Of<br>Miscarriage And Complications<br>Of Abortion |                                |                                    |                  |                                                                                                        |
| 9         | Kit 9: Suture Of Tears (Cervical &<br>Vaginal Examination)           |                                |                                    |                  |                                                                                                        |
| 10        | Kit 10: Vacuum Extraction<br>Delivery                                |                                |                                    |                  |                                                                                                        |
| 11        | Kit 11: Referral Level Kit For<br>Reproductive Health                |                                |                                    |                  |                                                                                                        |
| 12        | Kit 12 Blood Transfusion                                             |                                |                                    |                  |                                                                                                        |

## Infrastructure

### a. Standard precautions for infection prevention (ref: SARA reference manual of WHO)

| Serial no. | Activities                                                                                | Code<br>1 = Yes<br>0 = Not available | Remarks (How?) |
|------------|-------------------------------------------------------------------------------------------|--------------------------------------|----------------|
| 1.         | Appropriate storage of sharp object wastes (sharps box/container)                         |                                      |                |
| 2.         | Appropriate storage of infectious waste (waste receptacle with lid and plastic bin liner) |                                      |                |
| 3.         | Safe final disposal of sharp objects                                                      |                                      |                |
| 4.         | Safe final disposal of infectious wastes                                                  |                                      |                |

## ANNEXURE

### Code Book:

2.1 Health Service Information on SRHR Designation of the service provider/s Code: 1 – 20, 97 (for the details please follow below mentioned list)

1 = Gynecologists / Gynae Consultant

2 = Anesthesiologist

3 = Residential Medical Officer (RMO)

4 = Medical Officer

5 = Medical Assistant

6 = SACMO

7 = Health Inspector

8 = Nurse

9 = Midwife

10 = Trained Birth Attendants (TBA)

11 = other community health workers (FWA)

12 = CHCP

13 = Counsellor

14 = Laboratory technicians/ Medical Technologist

97 = Other (specify)
